1 **Anthropometric measurements as predictors of hypertension in Busia, Vihiga, Trans Nzoia**  
2 **and Siaya counties of Western Kenya**

3  
4 Thomas Andale<sup>1</sup>, Vitalis Orango<sup>2\*</sup>, Gerald O. Lwande<sup>2</sup>, Grace W. Mwaura<sup>2,3</sup>, Richard Mugo<sup>2</sup>,  
5 Obed K. Limo<sup>2</sup>, Ann Mwangi<sup>2,4</sup>, Jemima H. Kamano<sup>2,3</sup>.

6 **Author Affiliation:**

- 7 1. Moi Teaching and Referral Hospital, Eldoret, Kenya.  
8 2. Academic Model Providing Access to Healthcare (AMPATH), Eldoret, Kenya.  
9 3. Department of Medicine, School of Medicine, College of Health Science, Moi  
10 University, Eldoret-Kenya.  
11 4. Institute of Biomedical Informatics – Moi University; Eldoret-Kenya.

12  
13 **Funding:** This study was funded by Access Accelerated and World Bank (Grant Number: 0356)

14 **\* Corresponding Author:**

15 Vitalis Orango

16 Academic Model Providing Access To Healthcare (AMPATH)

17 P.O Box 4606-30100, Eldoret-Kenya.

18 Tel: +254720438875

19 Email: [vitalisorango@gmail.com](mailto:vitalisorango@gmail.com)

20 **Running Head:** Anthropometric measurements as hypertension predictors in Western Kenya.

## 21 **ABSTRACT**

22 Emerging data suggest a rise in the incidence rate of hypertension in many countries within Sub-  
23 Saharan Africa. This has been attributed to socioeconomic factors that have influenced diet and  
24 reduced physical activity further deranging anthropometric measurements. We assessed the  
25 predictive power of three anthropometric indicators namely: waist circumference (WC), waist to  
26 height ratio (WHtR) and body mass index (BMI) in detecting hypertension. This cross-sectional  
27 community survey was conducted in four counties within Western Kenya between October 2018  
28 to April 2019 among 3594 adults. The participants' sociodemographic data were collected using  
29 an interviewer-administered questionnaire and anthropometric measurements taken. We used the  
30 R-software for descriptive and inferential statistical analysis. Pearson chi-square test was used to  
31 assess the association between anthropometric measurements and hypertension while logistic  
32 regressions estimated the likelihood of hypertension. Youden method was used to identify  
33 optimal anthropometric cut-offs for sensitivity, specificity and area under the receiver operating  
34 characteristics (ROC) curve computation. The crude prevalence of hypertension was 23.3%,  
35 however it rose with advancement in age. Furthermore, obese individuals had a three-fold  
36 (AOR=2.64; 95% CI: 2.09, 3.35) increased likelihood of hypertension compared to those with a  
37 normal BMI. The optimal WC cut-off was 82.5cm for men and 87cm for women, an optimal  
38 WHtR of 0.47 for men and 0.55 for women; while the optimal BMI cut-off was 23.7 kg/m<sup>2</sup> and  
39 22.6 kg/m<sup>2</sup> for men and women respectively. The sensitivity of WC, WHtR and BMI for men  
40 was 0.60, 0.65 and 0.39 respectively and 0.71, 0.65 and 0.78 respectively for women. BMI is the  
41 best predictor for hypertension among women but a poor predictor for men; WC had a high  
42 hypertension predictive power for both gender while WHtR is the best hypertension predictor for  
43 men.  
44

45 **Keywords:** *Hypertension, Waist Circumference, BMI, Anthropometrics, Predictors, Western*  
46 *Kenya.*

## 48 **Introduction**

49 Hypertension as a non-communicable disease of the cardiovascular system has been reported to  
50 be a major cause of morbidity and mortality in many countries around the world [1–3].  
51 Hypertension increases the risk of cardiovascular and coronary heart disease [4]. Previous  
52 studies have indicated that risk factor modification could help bend the rising trend of the disease  
53 [4–6]. This is despite the anecdotal data reporting higher hypertension prevalence rates in  
54 countries with developed economies and higher per-capita income [7,8]; most of which are  
55 located within the Mediterranean and Atlantic regions [9–11]. However, emerging data from low

56 and middle income countries such as those in Sub-Saharan Africa have reported rising incidence  
57 rates for hypertension [6]. This has been attributed to sedentary lifestyle and dietary changes  
58 which directly affect the anthropometric characteristics of the affected individuals [5,12,13].  
59 Anthropometric measurements such as body-mass index (BMI), waist circumference (WC) and  
60 waist to height ratio (WHtR) are simple methods to assess body composition [5,12,14]. They  
61 describe the body's size, shape, mass and level of fatness as an initial screening technique for  
62 obesity and its associated complications such as hypertension. Although the World Health  
63 Organisation (WHO) instituted BMI as an epidemiological technique to assess obesity, it does  
64 not account for body-fat distribution. On the other hand, WC and WHtR have been reported as  
65 optimal techniques to describe more body fat, abdominal and central obesity as well as  
66 estimation of visceral adipose tissue that are often associated with metabolic changes that could  
67 result in hypertension. This association between anthropometric indices and hypertension have  
68 been previously reported in studies conducted in various countries across the globe with differing  
69 ethnicities and ancestry [13,15–17] . However, all these studies have reported varying optimal  
70 anthropometric techniques and cut-offs for predicting hypertension in the targeted populations  
71 [7,13,15,16]. For instance, among elderly men in Taiwan [7], Barbados and Cuba [18], WHtR  
72 was reported as the best predictor of hypertension. However, in the Japanese [8] and Cuban [18]  
73 populations, BMI alone had a higher predictive power for the presence of hypertension; while  
74 WC was a better predictor of hypertension among Taiwanese women [7] as well as Greek men  
75 and women [19]. Because of this conflicting evidence, it can be inferred that the predictive  
76 power of various anthropometric measurements largely depends on the target populations. This  
77 study therefore adds to the existing body of knowledge by assessing the predictive power of the

78 three anthropometric indices described by targeting rural and peri-urban dwelling adults of both  
79 gender within their communities in Western Kenya.

80 Although studies that assess anthropometric predictors of cardiovascular diseases such as  
81 hypertension have been previously published, most of these have been in controlled  
82 environments such as clinical settings and this could bias the reported outcomes [20,21].  
83 Furthermore, most of them have been conducted in other continents with different socio-  
84 demographic and economic characteristics for the enrolled study participants making them not  
85 spatially generalizable.

## 86 **Materials and methods**

87 This was a cross-sectional community survey conducted in four (Busia, Vihiga, Siaya and Trans  
88 Nzoia) counties of western Kenya between October 2018 and April 2019. The study targeted  
89 adults aged 18 years or more living in the selected counties who were stratified by their county  
90 of residence and randomly sampled systematically until a desired sample size of 3,594 was  
91 achieved. The sample size was obtained using Fischer's formula and proportionately distributed  
92 to the four counties (Busia = 900; Trans-Nzoia = 897; Siaya= 897 and Vihiga=900). Written  
93 informed consent was obtained from all the potential participants prior to enrollment. Interviewer  
94 administered questionnaires were conducted at the homes of the study participants to obtain their  
95 sociodemographic characteristics (age, gender, marital status, tribe, education level and  
96 occupation).

97 Seated blood pressure measurements were taken using a calibrated Omron M2 compact upper  
98 arm blood pressure monitor (Omron Healthcare, Inc., 1200 Lakeside Drive, Bannockburn,  
99 Illinois 60015) after the participant had rested for fifteen minutes. The choice of the appropriate  
100 blood-pressure equipment was informed by the participant's cuff size. Three blood pressure

101 readings were then taken after 5-minute intervals and the average reading computed.  
102 Hypertension was defined as either a systolic BP>140 mmHg and/or diastolic BP > 90 mmHg.  
103 This was followed by weight and height measurements using calibrated digital weighing scales  
104 and meter-rule. The BMI was computed by dividing the weight (in kilograms) and height (in  
105 squared meters. Based on the BMI values, clients were categorized into Underweight (<18.5  
106 Kg/m<sup>2</sup>) Normal (18.5-24.9 Kg/m<sup>2</sup>), Overweight (25-29.9 Kg/m<sup>2</sup>) and Obese (≥30 Kg/m<sup>2</sup>). Waist-  
107 circumference was measured using a tape-measure (calibrated in centimeters) to the nearest  
108 whole number. The normal cut-off for males and females was ≤102 cm and ≤88 cm respectively.  
109 Abnormal waist circumference values were set at >102 cm for males and > 88 cm for females.  
110 Lastly, WHtR was computed by dividing the waist circumference by height in centimeters.  
111 Participants with a WHtR ≥0.5 were considered to have a high risk of hypertension, while those  
112 below 0.5 had a low risk.

113 Statistical analyses were performed using R software. The mean and the standard deviation were  
114 used to describe continuous data while the count and the percentage were used to describe  
115 categorical data. Association between categorical variables were assessed using the chi square  
116 test. Group mean differences were tested using analysis of variance (ANOVA) technique.  
117 Pearson correlation was used to test for the strength of association between continuous BMI, WC  
118 and Weight height ratio. Logistic regressions were used to estimate the odds of hypertension  
119 among persons with different categories of anthropometrics levels. Youden method to was used  
120 to determine the optimal anthropometric cut-offs. The obtained cut-offs were compared with the  
121 recommended anthropometric cut-offs by the World Health Organization in terms of sensitivity,  
122 specificity and area under the curve. Ethical approvals were obtained from the Institutional  
123 Research and Ethics Committee of Moi Teaching and Referral Hospital and Moi University

124 School of Medicine (approval number 0002090), as well as the National Commission for  
125 Science, Technology and Innovation (NACOSTI) (approval number  
126 NACOSTI/P/18/74238/24329) and the respective four County Health Management Teams  
127 (CHMTs).

## 128 **Results**

129 This study enrolled 3,599 community members in four counties within Western Kenya with a  
130 nearly equal proportionate representation and gender distribution. The overall mean age of the  
131 study participants was 43.85 ( $\pm$  15.93) years with the youngest population being those from  
132 Siaya county with a mean age of 40.76 ( $\pm$  14.84) years. The difference in mean age distribution  
133 ( $p < 0.001$ ) and age categories ( $p < 0.001$ ) was significant across the counties sampled. The mean  
134 BMI of all the study participants was 23.83 ( $\pm$  9.62)  $\text{kg/m}^2$ . There was no statistically significant  
135 difference in mean and categorized BMI scores as well as weight to height ratios across the  
136 counties. Almost three-quarters ( $n=2634$ ) of the participants enrolled had a normal waist  
137 circumference with an overall mean waist circumference of 85.37 ( $\pm$ 12.6) centimeters.  
138 Hypertension was present among 23.2% ( $n=836$ ) of all the study participants enrolled with a  
139 statistically significant ( $p < 0.001$ ) difference in distribution across all the counties sampled.  
140 (Table 1).

141

142 **Table 1: Summary of Participant characteristics**

| Variable name             | Levels      | Total N=3575 n(%) | Busia N=901   | Trans Nzoia N=888 | Vihiga N=896  | Siaya N=890   | p-value |
|---------------------------|-------------|-------------------|---------------|-------------------|---------------|---------------|---------|
| <b>Gender</b>             | Male        | 1737 (48.6)       | 446 (49.5)    | 437 (49.2)        | 398 (44.4)    | 456 (51.2)    | 0.027   |
|                           | Female      | 1838 (51.4)       | 455 (50.5)    | 451 (50.8)        | 498 (55.6)    | 434 (48.8)    |         |
| <b>Age (years)</b>        | Mean (SD)   | 43.78 (15.91)     | 43.16 (16.53) | 47.23 (16.91)     | 44.07 (14.59) | 40.68 (14.81) | <0.001  |
| <b>Age Group (years)</b>  | 18-29       | 810 (22.7)        | 212 (23.5)    | 164 (18.5)        | 182 (20.3)    | 252 (28.3)    | <0.001  |
|                           | 30-44       | 1097 (30.7)       | 302 (33.5)    | 253 (28.5)        | 258 (28.8)    | 284 (31.9)    |         |
|                           | 45-59       | 982 (27.5)        | 226 (25.1)    | 256 (28.8)        | 276 (30.8)    | 224 (25.2)    |         |
|                           | 60-74       | 576 (16.1)        | 117 (13)      | 150 (16.9)        | 180 (20.1)    | 129 (14.5)    |         |
|                           | 75+         | 110 (3.1)         | 44 (4.9)      | 65 (7.3)          | 0 (0)         | 1 (0.1)       |         |
| <b>BMI (Continuous)</b>   | Mean (SD)   | 23.45 (4.74)      | 23.59 (4.84)  | 23.68 (4.69)      | 23.53 (4.91)  | 23 (4.48)     | 0.011   |
| <b>BMI Category</b>       | Underweight | 534 (14.9)        | 136 (15.1)    | 119 (13.4)        | 142 (15.8)    | 137 (15.4)    | 0.037   |
|                           | Normal      | 1979 (55.4)       | 488 (54.2)    | 493 (55.5)        | 470 (52.5)    | 528 (59.3)    |         |
|                           | Overweight  | 710 (19.9)        | 176 (19.5)    | 183 (20.6)        | 191 (21.3)    | 160 (18)      |         |
|                           | Obese       | 352 (9.8)         | 101 (11.2)    | 93 (10.5)         | 93 (10.4)     | 65 (7.3)      |         |
| <b>WC (Continuous)</b>    | Mean (SD)   | 85.15 (11.86)     | 84.42 (11.89) | 84.98 (11.67)     | 86.39 (12.39) | 84.82 (11.39) | 0.003   |
| <b>WC (Categorized)</b>   | Abnormal    | 946 (26.5)        | 235 (26.1)    | 225 (25.3)        | 271 (30.2)    | 215 (24.2)    | 0.023   |
|                           | Normal      | 2629 (73.5)       | 666 (73.9)    | 663 (74.7)        | 625 (69.8)    | 675 (75.8)    |         |
| <b>WHtR (Continuous)</b>  | Mean (SD)   | 0.51 (0.08)       | 0.51 (0.08)   | 0.51 (0.08)       | 0.52 (0.08)   | 0.51 (0.07)   | 0.001   |
| <b>WHtR (Categorized)</b> | High Risk   | 1739 (48.6)       | 425 (47.2)    | 432 (48.6)        | 482 (53.8)    | 400 (44.9)    | 0.001   |
|                           | Low Risk    | 1836 (51.4)       | 476 (52.8)    | 456 (51.4)        | 414 (46.2)    | 490 (55.1)    |         |
| <b>Hypertension</b>       | No          | 2752 (77.0)       | 693 (76.9)    | 590 (66.4)        | 688 (76.8)    | 781 (87.8)    | <0.001  |
|                           | Yes         | 823 (23.0)        | 208 (23.1)    | 298 (33.6)        | 208 (23.2)    | 109 (2.2)     |         |

143 **Legend:** *Abnormal Waist Circumference cut-offs – Men (> 102 cm), Female (>88 cm)*

144 *Normal Waist Circumference cut-offs - Men (≤102 cm), Female (≤88 cm)*

145 *WHtR ≥0.5 (High Risk); <0.5 (Low Risk)*

146 There was no statistically significant difference in the crude hypertension prevalence across  
 147 gender. Notably the prevalence of hypertension increased with age (p<0.001) with the mean age  
 148 of those with hypertension being higher at 53.2 compared to 41years (p<0.001). In addition, the  
 149 prevalence of hypertension significantly increased with increase in BMI (p<0.001), waist  
 150 circumference (p<0.001) and waist to height ratio (p>0.001) (Table 2).

151 **Table 2: Prevalence of hypertension by sociodemographic factors and anthropometric**  
 152 **measurements**

| <b>Variable name</b>      | <b>Levels</b> | <b>Normal<br/>2752 (77.0%)<br/>n (%)</b> | <b>Hypertensive<br/>823 (23.0%)<br/>n (%)</b> | <b>Total<br/>N=3575<br/>n (%)</b> | <b>p-value</b> |
|---------------------------|---------------|------------------------------------------|-----------------------------------------------|-----------------------------------|----------------|
| <b>Gender</b>             | Male          | 1332 (76.68)                             | 405 (23.32)                                   | 1737 (48.59)                      | 0.691          |
|                           | Female        | 1420 (77.26)                             | 418 (22.74)                                   | 1838 (51.41)                      |                |
| <b>Age (years)</b>        | Mean (SD)     | 41 ( $\pm$ 15.2)                         | 53.2 ( $\pm$ 14.7)                            | 43.8 ( $\pm$ 15.9)                | <0.001         |
| <b>Age Groups (years)</b> | 18-29         | 758 (93.58)                              | 52 (6.42)                                     | 810 (22.66)                       | <0.001         |
|                           | 30-44         | 935 (85.23)                              | 162 (14.77)                                   | 1097 (30.69)                      |                |
|                           | 45-59         | 659 (67.11)                              | 323 (32.89)                                   | 982 (27.47)                       |                |
|                           | 60-74         | 345 (59.9)                               | 231 (40.1)                                    | 576 (16.11)                       |                |
|                           | $\geq$ 75     | 55 (50.0)                                | 55 (50.0)                                     | 110 (3.08)                        |                |
| <b>BMI</b>                | Mean (SD)     | 23 ( $\pm$ 4.5)                          | 24.9 ( $\pm$ 5.3)                             | 23.5 ( $\pm$ 4.7)                 | <0.001         |
| <b>BMI (Categorized)</b>  | Underweight   | 444 (83.15)                              | 90 (16.85)                                    | 534 (14.94)                       | <0.001         |
|                           | Normal        | 1590 (80.34)                             | 389 (19.66)                                   | 1979 (55.36)                      |                |
|                           | Overweight    | 502 (70.7)                               | 208 (29.3)                                    | 710 (19.86)                       |                |
|                           | Obese         | 216 (61.36)                              | 136 (38.64)                                   | 352 (9.85)                        |                |
| <b>WC (Continuous)</b>    | Mean (SD)     | 83.5 ( $\pm$ 10.9)                       | 90.7 ( $\pm$ 13.1)                            | 85.2 ( $\pm$ 11.9)                | <0.001         |
| <b>WC (Categorized)</b>   | Abnormal      | 619 (65.43)                              | 327 (34.57)                                   | 946 (26.46)                       | <0.001         |
|                           | Normal        | 2133 (81.13)                             | 496 (18.87)                                   | 2629 (73.54)                      |                |
|                           | Normal        | 2553 (78.48)                             | 700 (21.52)                                   | 3253 (90.99)                      |                |
| <b>WHtR (Continuous)</b>  | Mean (SD)     | 0.5 ( $\pm$ 0.1)                         | 0.5 ( $\pm$ 0.1)                              | 0.5 ( $\pm$ 0.1)                  | <0.001         |
| <b>WHtR (Categorical)</b> | High Risk     | 1197 (68.83)                             | 542 (31.17)                                   | 1739 (48.64)                      | <0.001         |
|                           | Low Risk      | 1555 (84.69)                             | 281 (15.31)                                   | 1836 (51.36)                      |                |

153



154 Obese males were nearly four times (AOR = 3.90; 95% CI: 2.12, 7.19) more likely to have  
 155 hypertension compared to their normal counterparts while to obese females who were two-times  
 156 (AOR =2.12; 95% CI: 1.55, 2.90) more likely to have hypertension compared to females with a  
 157 normal BMI. Similarly, males with an abnormal waist circumference were nearly four times  
 158 (AOR=3.78; 95% CI: 2.40, 6.03) likely to have hypertension while female participants were  
 159 twice as likely. Both males (AOR=2.18; 95% CI: 1.70 2.80) and females (AOR =2.20; 95% CI:  
 160 1.64, 2.98) who had high risk WHtR had similar odds of having hypertension (Table 3).

161 **Table 3: Univariate Logistic regression between anthropometric measurements and its**  
 162 **association hypertension**

| Explanatory                                                                            | Men       |         |                   | Female   |         |                   |
|----------------------------------------------------------------------------------------|-----------|---------|-------------------|----------|---------|-------------------|
|                                                                                        | Estimate  | p-value | AOR (95% CI)      | Estimate | p-value | AOR (95% CI)      |
| <b>BMI(Continuous)</b>                                                                 | 0.11      | <0.001  | 1.12 (1.08, 1.15) | 0.08     | <0.001  | 1.08 (1.06, 1.1)  |
| <b>BMI</b>                                                                             |           |         |                   |          |         |                   |
| Normal                                                                                 | Reference |         |                   |          |         |                   |
| Underweight                                                                            | -0.35     | 0.03    | 0.70 (0.51, 0.96) | -0.59    | 0.03    | 0.55 (0.32, 0.94) |
| Overweight                                                                             | 0.79      | <0.001  | 2.20 (1.58, 3.04) | 0.37     | 0.01    | 1.45 (1.08, 1.93) |
| Obese                                                                                  | 1.36      | <0.001  | 3.90 (2.12, 7.19) | 0.75     | <0.001  | 2.12 (1.55, 2.90) |
| <b>WC (Continuous)</b>                                                                 | 0.05      | 0.00    | 1.05 (1.04, 1.06) | 0.04     | <0.001  | 1.04 (1.03, 1.05) |
| <b>Waist circumference</b>                                                             |           |         |                   |          |         |                   |
| Normal                                                                                 | Reference |         |                   |          |         |                   |
| Abnormal                                                                               | 1.33      | <0.001  | 3.78 (2.40, 6.03) | 0.79     | <0.001  | 2.2 (1.71, 2.82)  |
| <b>Waist Height Ratio (WHtR)</b>                                                       |           |         |                   |          |         |                   |
| Low Risk                                                                               | Reference |         |                   |          |         |                   |
| High Risk                                                                              | 0.78      | <0.001  | 2.18 (1.70 2.80)  | 0.79     | <0.001  | 2.20 (1.64 2.98)  |
| <i>Waist circumference (WC)- Female cut-off: Abnormal &gt;=88cm, Normal &lt; 88 cm</i> |           |         |                   |          |         |                   |
| <i>Waist circumference (WC)- Male cut-off: Abnormal ≥102 cm, Normal &lt;102 cm</i>     |           |         |                   |          |         |                   |
| <i>Waist to height ratio (WHtR): high risk ≥0.5, Low risk &lt;0.5</i>                  |           |         |                   |          |         |                   |

163 Optimal waist circumference cut-off was 82.5cm for men and 87cm for women, with a  
 164 sensitivity of 0.60 and 0.71 respectively. The WC cut-off for men was much lower than that  
 165 recommended by the World Health Organisation (WHO) however, this study's WC cut-off for  
 166 women was similar to WHO recommendations. The optimal WHtR cut-off 0.47 and 0.55 for

167 men and women respectively with both giving a similar sensitivity of 0.65. On the other hand,  
168 optimal BMI cut-off was 23.7 and 22.6 kg/m<sup>2</sup> for male and females, respectively. The optimal  
169 BMI cut-off for men had the lowest sensitivity (0.39) compared to the other anthropometric  
170 measures for men; however, it still had a better sensitivity compared to the sensitivity of 0.06  
171 obtained when WHO recommended cut-off for BMI among male individuals was used. The  
172 optimal BMI cut-off for females in this study gave the highest sensitivity of 0.78 compared to all  
173 other anthropometric measurements (Table 4).

174 **Table 4: Assessing optimal cut-off points for anthropometric predictors of hypertension.**

|                            |                 | Youden Method    |                   |                  | WHO Recommended Cut-off s |                  |                  |                  |
|----------------------------|-----------------|------------------|-------------------|------------------|---------------------------|------------------|------------------|------------------|
|                            | Optimal Cut-off | Sensitivity      | Specificity       | AUC              | WHO Cut-off               | Sensitivity      | Specificity      | AUC              |
| <b>Waist circumference</b> |                 |                  |                   |                  |                           |                  |                  |                  |
| Men                        | 82.5 cm         | 0.60(0.55,0.65)  | 0.64(0.61,0.67)   | 0.62 (0.59,0.65) | 102 cm                    | 0.13 (0.10-0.17) | 0.97(0.96-0.98)  | 0.55(0.53-0.57)  |
| Female                     | 87 cm           | 0.71(0.66,0.75)  | 0.55 (0.53, 0.58) | 0.63 (0.61,0.66) | 88 cm                     | 0.67 (0.62-0.71) | 0.59 (0.56-0.61) | 0.62(0.60 -0.65) |
| <b>Waist Height Ratio</b>  |                 |                  |                   |                  |                           |                  |                  |                  |
| Men                        | 0.47            | 0.65(0.61, 0.70) | 0.60(0.57,0.62)   | 0.62(0.59,0.65)  | 0.50                      | 0.49(0.44,0.54)  | 0.75(0.73,0.78)  | 0.62(0.59, 0.64) |
| Female                     | 0.55            | 0.65(0.60, 0.69) | 0.64(0.61,0.66)   | 0.63(0.61, 0.67) | 0.50                      | 0.83(0.79,0.86)  | 0.39(0.36,0.41)  | 0.61(0.58,0.63)  |
| <b>BMI</b>                 |                 |                  |                   |                  |                           |                  |                  |                  |
| Men                        | 23.7            | 0.39(0.35-0.43)  | 0.80(0.77-0.82)   | 0.59(0.57-0.62)  | 30                        | 0.06(0.04-0.09)  | 0.98(0.97-0.99)  | 0.52(0.51-0.53)  |
| Female                     | 22.6            | 0.78(0.74-0.812) | 0.39 (0.36-0.42)  | 0.58(0.56-0.61)  | 30                        | 0.26(0.22-0.31)  | 0.86(0.85-0.88)  | 0.56(0.54-0.59)  |

175

176

## 177 **Discussion**

178 This study enrolled 3575 community members from four counties in Western Kenya with a mean  
179 age of 43.9 ( $\pm 15.9$ ) years of whom 1856 (51.6%) were female. This finding is slightly different  
180 from a community study conducted in Ethiopia [13] where the mean age of the study  
181 participants was 38.3 ( $\pm 10.9$ ) years, majority (54.2%) of whom were male. Although the  
182 difference in gender proportions in both studies was not statistically significant, the study  
183 conducted in Ethiopia [13] enrolled fewer (N=312) participants in a single (Kombolcha) town  
184 within Northeast Ethiopia compared to this larger community study that enrolled participants  
185 from a wider geographic region of Western Kenya. Although both the current study and that  
186 from Northeast Ethiopia [13] adopted the World Health Organisation (WHO) recommended  
187 STEPWISE tool to capture participants sociodemographic characteristics and nutritional status  
188 information; they still had differing community hypertension prevalence of 23.2% and 30.8%  
189 [13] respectively. Disease prevalence rates differ spatially and this could explain a higher  
190 community prevalence of hypertension in Ethiopia's capital city (Addis Ababa) at 30.2% [12]  
191 and in Northwest Ethiopia at 28.3% [15]. In Nigeria's Abia State, the prevalence of hypertension  
192 was found to be 31% [22] in a large survey (N=2928) that went house to house to determine the  
193 community prevalence of hypertension and its determinants. Similarly in Ghana's community-  
194 based improvement program for hypertension [16], the prevalence of the disease was found to  
195 be 32.4% among 2337 individuals against a national average of between 20-32% [23].

196 This study reports a mean body mass index of 23.8 ( $\pm 9.6$ ) kg/m<sup>2</sup> of which more than half (55%)  
197 of the community members enrolled had a normal BMI, 19.7% were overweight and 10.4%  
198 obese. From the findings of two studies conducted in Ethiopia [13,15], slightly higher mean  
199 BMI was reported at 25.7 ( $\pm 2.4$ ) kg/m<sup>2</sup> [13] and 24.7 ( $\pm 4.6$ ) kg/m<sup>2</sup> [15]; a difference that could  
200 be attributed to a higher proportion (14.9%) of underweight participants enrolled in this study  
201 compared to 2.9% in Ethiopia [15]. In a study conducted in Ghana [16], the mean BMI index  
202 was 25.5 kg/m<sup>2</sup> which is higher than the current study, a finding that could be attributed to  
203 lower proportion of underweight (7.3%) and normal (45.7%) participants. The likelihood of  
204 hypertension was higher among obese (AOR=3.9; 95% CI: 2.24, 6.81) male individuals  
205 compared to overweight (AOR=2.64.; 95% CI: 1.93, 3.58) males. The likelihood of obese  
206 females (AOR= 2.61; 95% CI: 1.96, 3.45) to be hypertensive was lower compared to their male

207 counterparts. Although a study conducted in Zanzibar [24] did not stratify hypertension risk by  
208 gender rather than age categories, obese individuals older than forty years (AOR= 3.7; 95% CI:  
209 1.3, 10.5) were more likely to be hypertensive compared to overweight individuals (AOR = 1.6;  
210 95% CI: 0.7, 4.0) of the same age. In Saudi Arabia [25], obese individuals had a two-fold (OR=  
211 2.22; 95% CI: 1.94, 2.54) increased likelihood of hypertension compared to those with a normal  
212 BMI. These two studies [24,25] confirm that a rise in body mass index is significantly associated  
213 with an increased risk of hypertension among the affected individuals.

214 This study further used the Younden method to identify optimal BMI cut-off for detecting  
215 hypertension. Among men, the optimal cut-off was 23.7 kg/m<sup>2</sup> which was compared to the  
216 recommended WHO cut-off of 30 kg/m<sup>2</sup> resulting in sensitivities of 0.39 (0.35-0.43) and  
217 0.07(0.04-0.10) respectively. This signifies that with a lower BMI cut-off in rural Western  
218 Kenya, there is a higher the probability of detecting those with hypertension. However, a higher  
219 specificity of 0.98(0.97-0.99) was obtained using the WHO cut-off compared to 0.80 (0.77-0.82)  
220 that was obtained using the Younden cut-off for men. This study reports that to rule-out the  
221 presence of hypertension, it is appropriate to use the WHO recommended cut-offs. Overall, a  
222 BMI cut-off of 23.7 kg/m<sup>2</sup> had a higher area under the curve (AUC) of 0.59(0.57-0.62)  
223 compared to 0.52 (0.51-0.53) when a cut-off of 30 kg/m<sup>2</sup> was used. The AUC findings using a  
224 BMI cut-off of 23.7 kg/m<sup>2</sup> compares to that in Korea [7] at 0.601. Similarly, in a second study  
225 conducted in Korea [26] that used nearly similar BMI cut-offs (23.59 kg/m<sup>2</sup>), the AUC was 0.58  
226 (0.56, 0.60). However, in a study conducted in Nigeria [5], the AUC obtained using a Younden  
227 cut-off of 24.49 kg/m<sup>2</sup> was 0.698 which is higher than the current study, with equally higher  
228 sensitivity of 0.73. However, these results from Nigeria reported lower specificity rate (0.60)  
229 than the current study, which could be attributed to the use of different BMI cut-offs. Overall,  
230 BMI is a poor predictor of hypertension among men living in rural western Kenya communities.

231 Among females the optimal BMI cut-off obtained was 27.1 kg/m<sup>2</sup> which gave a sensitivity,  
232 specificity and AUC of 0.45(0.41-0.51), 0.72(0.70-0.74) and 0.58(0.56-0.61) respectively  
233 compared to the WHO recommended cut-off of 30 kg/m<sup>2</sup> which had lower sensitivity (0.28) and  
234 AUC (0.56) but higher specificity (0.86). The use of BMI as a predictor of hypertension among  
235 women living in peri-urban and rural communities within Western Kenya is similar to studies  
236 conducted in Japan [8] and Cuba [18] which reported BMI as a good hypertension predictor for

237 women. In a study targeting the Filipino-American women population living in four cities within  
238 the United States of America [27], a BMI cut-off of  $25.5 \text{ kg/m}^2$  was used giving higher  
239 sensitivity (0.65) and AUC (0.66) for detecting hypertension compared to the current study. A  
240 difference that could be attributed to average morphometric differences across race and  
241 geographic regions. Similarly among Korean women [26], when a BMI cut-off of  $25.63 \text{ kg/m}^2$   
242 was used to predict hypertension, nearly similar sensitivity (0.43), specificity (0.71) and AUC  
243 (0.57) to the current study were obtained. These findings confirm the recommendations of  
244 previous studies [28,29] on the need for using region-specific BMI cut-offs to predict  
245 hypertension.

246 The mean waist circumference of the study participants was  $85.37 (\pm 12.26)$  cm which was  
247 comparable to the finding in Nigeria at  $83.7 (\pm 11.4)$  cm [22]. This study used similar waist  
248 circumference cut-off as those used in studies conducted in Ethiopia [13] and Nigeria [22] at  
249 88cm for women and 102 cm for men. Nearly equal proportions of abnormal waist  
250 circumference were reported in this study (26.8%) and in Ethiopia (29.5%) [13] while lower  
251 proportions (20.7%) were noted in Nigeria [22]. We report that waist circumference is more  
252 sensitive for women (0.71) compared to men (0.60). This is similar to findings reported in  
253 Taiwan [7] where waist circumference alone was a good predictor of hypertension.

254 Lastly, the sensitivity and area under the ROC curve for waist height ratio was similar for both  
255 the male and female participants. This signifies that waist to height ratio alone can be used as a  
256 predictor of hypertension in western Kenya. Previous community screening programmes have  
257 over-relied on the use of BMI, however this study makes a case for the use of waist to height  
258 ratio which is both cheaper and less cumbersome. Furthermore, the sensitivity of waist to height  
259 ratio was highest for men in comparison to other anthropometric indicators. This is because waist  
260 to height ratio takes into account the individual's body fat as well as their abdominal and central  
261 obesity which could be missed out when using BMI alone [5]. This study was conducted in peri-  
262 urban and rural western Kenya populations which are leaner compared to urban dwelling  
263 individuals in both Western Kenya and the rest of the country. This therefore implies that the  
264 findings of the study are not representative of what has been previously reported in more  
265 urbanized settlements within Kenya.

## 266 **Conclusions and Recommendations**

267 Waist circumference and waist to height ratio are good predictors of hypertension among adult  
268 individuals irrespective of their gender. Body mass index has the highest sensitivity for detecting  
269 hypertension among women but the least sensitivity for men. We recommend the combined use  
270 of all the three anthropometric measurements as predictors of hypertension in local community  
271 screening programmes for the disease. There is need to review the use of BMI alone as a  
272 hypertension predictor among men in Western Kenya. Community screening programmes for  
273 hypertension should also consider using other hypertension markers such as biochemical tests  
274 and nutritional status alongside anthropometric measurements. Future studies using similar  
275 anthropometric measurements should be conducted in more urban settlements of Kenya to  
276 demonstrate socioeconomic differences in anthropometric cut-offs for hypertension.

## 277 **Acknowledgements**

278 This study received financial support from Access Accelerated through a cooperative agreement  
279 between World Bank and the division of non-communicable diseases (NCDs) in the Ministry of  
280 Health-Kenya. We would like to thank the management of Moi Teaching and Referral Hospital  
281 (MTRH), Moi University, Busia, Siaya, Vihiga and Trans Nzoia counties for offering an  
282 implementation agreement that enabled data collection in the respective counties. We are also  
283 grateful to the Academic Model Providing Access to Healthcare (AMPATH) for providing  
284 technical support for this study as well as the study participants for being part of this.

285

## 286 **References**

- 287 1. Bowry MBChB, MSc ADK, Lewey MD J, Dugani MD, PhD SB, Choudhry MD, PhD  
288 NK. The Burden of Cardiovascular Disease in Low- and Middle-Income Countries:  
289 Epidemiology and Management . Canadian Journal of Cardiology . 2015.  
290 doi:10.1016/j.cjca.2015.06.028
- 291 2. Vedanthan R, Kamano JH, Naanyu V, Delong AK, Were MC, Finkelstein EA, et al.  
292 Optimizing linkage and retention to hypertension care in rural Kenya (LARK  
293 hypertension study): Study protocol for a randomized controlled trial. *Trials*. 2014;15:  
294 143. doi:10.1186/1745-6215-15-143
- 295 3. Mercer T, Njuguna B, Bloomfield GS, Dick J, Finkelstein E, Kamano J, et al.  
296 Strengthening referral networks for management of hypertension across the health system  
297 (STRENGTHS) in western Kenya: A study protocol of a cluster randomized trial. *Trials*.

- 298 2019;20: 554. doi:10.1186/s13063-019-3661-4
- 299 4. Ekwunife OI, Udeogaranya PO, Nwatu IL. Prevalence, awareness, treatment and control  
300 of hypertension in a nigerian population. *Health (Irvine Calif)*. 2010;02: 731–735.  
301 doi:10.4236/health.2010.27111
- 302 5. Ononamadu CJ, Ezekwesili CN, Onyeukwu OF, Umeoguaju UF, Ezeigwe OC, Ihegboro  
303 GO. Comparative analysis of anthropometric indices of obesity as correlates and potential  
304 predictors of risk for hypertension and prehypertension in a population in Nigeria.  
305 *Cardiovasc J Afr*. 2017;28: 92–99. doi:10.5830/CVJA-2016-061
- 306 6. Akwanalo C, Njuguna B, Mercer T, Pastakia SD, Mwangi A, Dick J, et al. Strategies for  
307 Effective Stakeholder Engagement in Strengthening Referral Networks for Management  
308 of Hypertension Across Health Systems in Kenya. *Glob Heart*. 2019;14: 173–179.  
309 doi:10.1016/j.gheart.2019.06.003
- 310 7. Lee BJ, Kim JY. A comparison of the predictive power of anthropometric indices for  
311 hypertension and hypotension risk. *PLoS One*. 2014;9. doi:10.1371/journal.pone.0084897
- 312 8. Sakurai M, Miura K, Takamura T, Ota T, Ishizaki M, Morikawa Y, et al. Gender  
313 differences in the association between anthropometric indices of obesity and blood  
314 pressure in Japanese. *Hypertens Res*. 2006;29: 75–80. doi:10.1291/hypres.29.75
- 315 9. Neufeld LM, Jones-Smith JC, García R, Fernald LCH. Anthropometric predictors for the  
316 risk of chronic disease in non-diabetic, non-hypertensive young Mexican women. *Public  
317 Health Nutr*. 2008;11: 159–167. doi:10.1017/S136898000700002X
- 318 10. Petersen I, Fairall L, Zani B, Bhana A, Lombard C, Folb N, et al. Effectiveness of a task-  
319 sharing collaborative care model for identification and management of depressive  
320 symptoms in patients with hypertension attending public sector primary care clinics in  
321 South Africa: pragmatic parallel cluster randomised controlled . *J Affect Disord*.  
322 2021;282: 112–121. doi:10.1016/j.jad.2020.12.123
- 323 11. Kurnia AD, Melizza N, Ruhyanudin F, Masrurroh NL, Prasetyo YB, Setyowati CI, et al.  
324 The Effect of Educational Program on Hypertension Management Toward Knowledge and  
325 Attitude Among Uncontrolled Hypertension Patients in Rural Area of Indonesia. *Int Q  
326 Community Health Educ*. 2020. doi:10.1177/0272684X20972846
- 327 12. Tesfaye F, Byass P, Wall S. Populationbased prevalence of high blood pressure among  
328 adults in Addis Ababa: Uncovering a silent epidemic. *BMC Cardiovasc Disord*. 2009;9:  
329 1–10. doi:10.1186/1471-2261-9-39
- 330 13. Hassen B, Mamo H. Prevalence and associated anthropometric and lifestyle predictors of  
331 hypertension among adults in Kombolcha town and suburbs, Northeast Ethiopia: A  
332 community-based cross-sectional study. *BMC Cardiovasc Disord*. 2019;19: 1–10.  
333 doi:10.1186/s12872-019-1225-x
- 334 14. Perissinotto E, Pisent C, Sergi G, Grigoletto F, Enzi G. Anthropometric measurements in  
335 the elderly: age and gender differences. *Br J Nutr*. 2002;87: 177–186.  
336 doi:10.1079/bjn2001487
- 337 15. Moges B, Amare B, Fantahun B, Kassu A. High prevalence of overweight, obesity, and



- 338 hypertension with increased risk to cardiovascular disorders among adults in northwest  
339 Ethiopia: A cross sectional study. *BMC Cardiovasc Disord.* 2014;14: 1–10.  
340 doi:10.1186/1471-2261-14-155
- 341 16. Lamptey P, Laar A, Adler AJ, Dirks R, Caldwell A, Prieto-Merino D, et al. Evaluation of  
342 a community-based hypertension improvement program (ComHIP) in Ghana: data from a  
343 baseline survey. *BMC Public Health.* 2017;17: 1–16. doi:10.1186/s12889-017-4260-5
- 344 17. Pytel K, Nawarycz T, Drygas W. Anthropometric predictors and artificial neural networks  
345 in the diagnosis of hypertension. *Proc 2015 Fed Conf Comput Sci Inf Syst FedCSIS 2015.*  
346 2015; 287–290. doi:10.15439/2015F246
- 347 18. Barbosa AR, Munaretti DB, Da Silva Coqueiro R, Borgatto AF. Anthropometric indexes  
348 of obesity and hypertension in elderly from Cuba and Barbados. *J Nutr Heal Aging.*  
349 2011;15: 17–21. doi:10.1007/s12603-011-0007-7
- 350 19. Panagiotakos DB, Chrysohoou C, Pitsavos C, Skoumas J, Lentzas Y, Katinioti A, et al.  
351 Hierarchical analysis of anthropometric indices in the prediction of 5-year incidence of  
352 hypertension in apparently healthy adults: The ATTICA study. *Atherosclerosis.* 2009;206:  
353 314–320. doi:10.1016/j.atherosclerosis.2009.02.030
- 354 20. Vögele A, Johansson T, Renom-Guiteras A, Reeves D, Rieckert A, Schlender L, et al.  
355 Effectiveness and safety of beta blockers in the management of hypertension in older  
356 adults: A systematic review to help reduce inappropriate prescribing. *BMC Geriatr.*  
357 2017;17. doi:10.1186/s12877-017-0575-4
- 358 21. Musyoka FM, Thiga MM, Muketha GM. A 24-hour ambulatory blood pressure  
359 monitoring system for preeclampsia management in antenatal care. *Informatics Med*  
360 *Unlocked.* 2019;16. doi:10.1016/j.imu.2019.100199
- 361 22. Ogah OS, Madukwe OO, Chukwuonye II, Onyeonoro UU, Ukegbu AU, Akhimien MO, et  
362 al. Prevalence and determinants of hypertension in Abia State Nigeria: Results from the  
363 Abia State non-communicable diseases and cardiovascular risk factors survey. *Ethn Dis.*  
364 2013;23: 161–167. doi:10.1097/01.hjh.0000419849.68293.d9
- 365 23. GSS GHS, Macro ICF. Ghana demographic and health survey 2014. Ghana Stat Serv  
366 Ghana Heal Serv ICF Int. 2015.
- 367 24. Brackmann LK, Buck C, Nyangasa MA, Kelm S, Sheikh M, Hebestreit A.  
368 Anthropometric and Biochemical Predictors for Hypertension in a Cross-Sectional Study  
369 in Zanzibar, Tanzania. *Front Public Heal.* 2019;7. doi:10.3389/fpubh.2019.00338
- 370 25. Saeed AA, Al-Hamdan NA. Anthropometric risk factors and predictors of hypertension  
371 among Saudi adult population - A national survey. *J Epidemiol Glob Health.* 2013;3: 197–  
372 204. doi:10.1016/j.jegh.2013.08.004
- 373 26. Lee JW, Lim NK, Baek TH, Park SH, Park HY. Anthropometric indices as predictors of  
374 hypertension among men and women aged 40-69 years in the Korean population: The  
375 Korean Genome and Epidemiology Study. *BMC Public Health.* 2015;15: 1–7.  
376 doi:10.1186/s12889-015-1471-5
- 377 27. Battie CA, Borja-Hart N, Ancheta IB, Flores R, Rao G, Palaniappan L. Comparison of

- 378 body mass index, waist circumference, and waist to height ratio in the prediction of  
379 hypertension and diabetes mellitus: Filipino-American women cardiovascular study. *Prev*  
380 *Med Reports*. 2016;4: 608–613. doi:10.1016/j.pmedr.2016.10.003
- 381 28. Lin WY, Lee LT, Chen CY, Lo H, Hsia HH, Liu IL, et al. Optimal cut-off values for  
382 obesity: Using simple anthropometric indices to predict cardiovascular risk factors in  
383 Taiwan. *Int J Obes*. 2002;26: 1232–1238. doi:10.1038/sj.ijo.0802040
- 384 29. Tuan NT, Adair LS, He K, Popkin BM. Optimal cutoff values for overweight: Using body  
385 mass index to predict incidence of hypertension in 18- to 65-year-old chinese adults. *J*  
386 *Nutr*. 2008;138: 1377–1382. doi:10.1093/jn/138.7.1377
- 387
